# Supplementary material for: Electronic properties of polymorphic two-dimensional layered chromium disulphide
Source: Royal Society of Chemistry journal article supplement (doi:10.1039/c9nr04449c), 2019-01-01
Supplement: c9nr04449c1.pdf [file c9nr04449c1.pdf]

## Supporting Information

### Electronic Properties of Polymorphic Two-Dimensional Layered Chromium Disulphide

Mohammad Rezwan Habib,<sup>a, #</sup> Shengping Wang,<sup>b, #</sup> Weijia Wang,<sup>a</sup> Han Xiao,<sup>a</sup> Sk Md Obaidulla,<sup>a</sup> Anabil Gayen,<sup>a</sup> Yahya Khan,<sup>a</sup> Hongzheng Chen,<sup>b</sup> and Mingsheng Xu<sup>a\*</sup>

<sup>a</sup> State Key Laboratory of Silicon Materials, College of Information Science & Electronic Engineering, Zhejiang University, Hangzhou 310027, P. R. China.

<sup>b</sup> Department of Polymer Science and Engineering, Zhejiang University, Hangzhou 310027, P. R. China.

\* Corresponding author: msxu@zju.edu.cn

# These authors contributed equally to this work

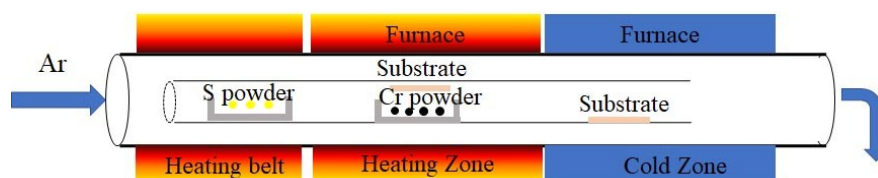

**Fig. S1** (a) Schematic illustration of CVD system for 2D layered CrS<sub>2</sub> synthesis.

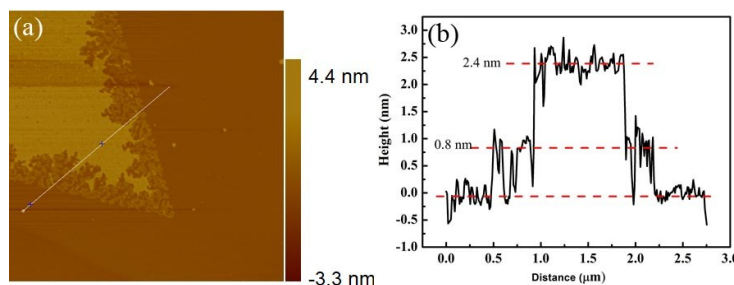

**Fig. S2** (a) AFM topological image of CrS<sub>2</sub> flake. (b) The height profile taken across the line in (a). The results show a layered structure of our 2D CrS<sub>2</sub> flake.

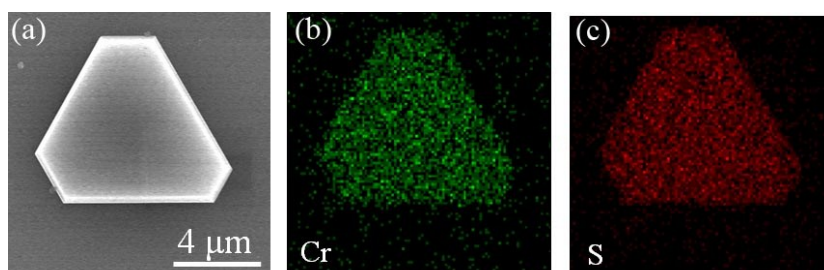

**Fig. S3** (a) SEM image of a  $\text{CrS}_2$  flake. Corresponding EDX mapping of (b) Cr and (c) S, suggesting quite uniform distribution of the Cr and S elements in the flake.

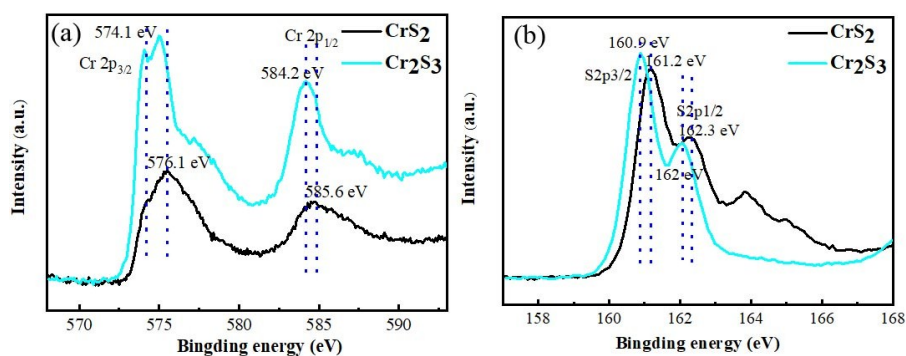

**Fig. S4** Comparison of XPS patterns of Cr 2p and S 2p for the  $\text{Cr}_2\text{S}_3$  powder and our  $\text{CrS}_2$  sample. (a) Cr 2p patterns. (b) S 2p patterns. The energies were calibrated as C 1s peak as 284.5 eV.

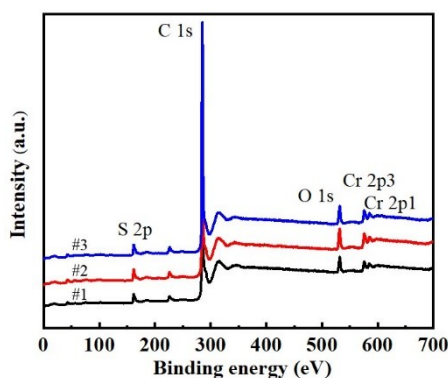

**Fig. S5** XPS patterns of  $\text{CrS}_2$  collected at different measurement positions.

**Table S1.** Atomic percentage (atomic %) of the sample based on the measurements in Fig. S5.

| Measurement | C 1s  | O 1s | S 2p | Cr 2p | Cr 2p/S 2p |
|-------------|-------|------|------|-------|------------|
| #1          | 93.2% | 3.7% | 2.1% | 1.0%  | 1.0 : 2.1  |
| #2          | 91.7% | 4.5% | 2.5% | 1.3%  | 1.0 : 1.92 |
| #3          | 92.6% | 4.0% | 2.3% | 1.1%  | 1.0 : 2.09 |

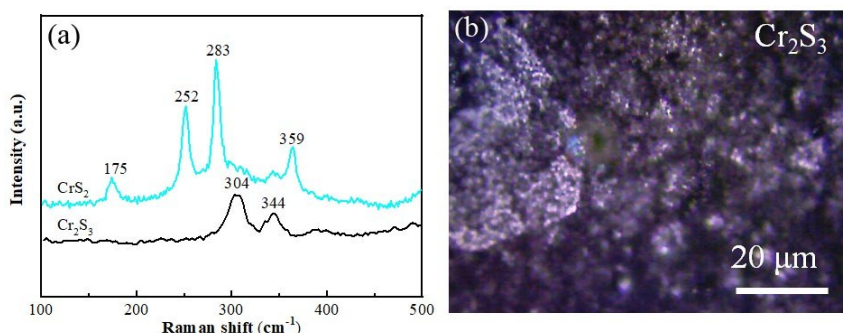

**Fig. S6** (a) Comparison of Raman scatterings of our  $\text{CrS}_2$  and  $\text{Cr}_2\text{S}_3$  powder. (b) Optical image shows where the Raman spectrum of  $\text{Cr}_2\text{S}_3$  was obtained.

#### A. Comparison of Raman characteristics of our 2D layered $\text{CrS}_2$ to non-layered $\text{Cr}_2\text{S}_3$

Very recently, Zhou et al.<sup>1</sup> reported synthesis of 2D non-layered  $\text{Cr}_2\text{S}_3$  and characterized it by Raman technique in details. They found that the  $\text{Cr}_2\text{S}_3$  ultrathin flakes have six Raman modes labeled as P1 ( $\sim 175.7 \text{ cm}^{-1}$ ), P2 ( $\sim 247.4 \text{ cm}^{-1}$ ), P3 ( $\sim 281 \text{ cm}^{-1}$ ), P4 ( $\sim 304.6 \text{ cm}^{-1}$ ), P5 ( $\sim 337.9 \text{ cm}^{-1}$ ), and P6 ( $\sim 355.5 \text{ cm}^{-1}$ ), respectively. Among these six Raman modes, P1, P2, P3, P6 have relatively distinguishable intensity. They also found that for the non-layered rhombohedral  $\text{Cr}_2\text{S}_3$ , the abnormal red-shift of the P2, P3, P6 modes (no change of P1) with increase in the thickness is mainly attributed to the change of covalent bond strength between Cr and S atoms coming from the stacking effect.

Besides the Raman spectrum presented in main text, we here show the Raman spectrum of another  $\text{CrS}_2$  flake (few layer) with a different thickness from that (about 6.4 nm) in

the main text. The peaks of Raman modes of our sample are at about 175  $\text{cm}^{-1}$ , 252  $\text{cm}^{-1}$ , 283  $\text{cm}^{-1}$  and 359  $\text{cm}^{-1}$  (Fig. S7). And the Raman modes of our  $\text{Cr}_2\text{S}_3$  powder are at about 304  $\text{cm}^{-1}$  and 344  $\text{cm}^{-1}$ . These compounds containing Cr and S have some similar Raman features, but they show distinguishing characteristics from each other. As mentioned above, the different covalent bond strength between Cr and S atoms influences the Raman shift. Thus, the different positions of Raman peaks of our  $\text{CrS}_2$  sample from the  $\text{Cr}_2\text{S}_3$  ultrathin film is reasonable. In addition, the discussion of the layer-dependent Raman features and the assignment/identification of the modes of our 2D  $\text{CrS}_2$  are beyond the scope of the present work.

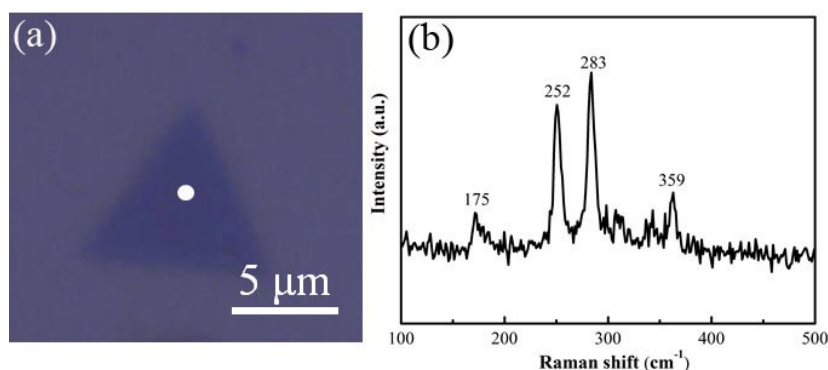

**Fig. S7** (a) Optical image of a  $\text{CrS}_2$  flake. (b) Raman spectrum collected at the white dot position in (a).

**Table S2.** Summary of Raman peak positions of different samples.

| Sample\Raman mode (cm <sup>-1</sup> )                                                                                       | P1          | P2         | P3         | P4    | P5    | P6         |
|-----------------------------------------------------------------------------------------------------------------------------|-------------|------------|------------|-------|-------|------------|
| Non-layered Cr <sub>2</sub> S <sub>3</sub><br>(Adv. Funct. Mater. <b>2019</b> , 29, 1805880.)<br>(laser $\lambda$ = 633 nm) | 175.7       | 247.4      | 281        | 304.6 | 337.9 | 355.5      |
| Our CrS <sub>2</sub> (laser $\lambda$ = 532 nm)                                                                             | 175.0       | 252.0      | 283.0      |       |       | 359.0      |
| $\Delta = R_{\text{CrS}_2} - R_{\text{Cr}_2\text{S}_3}$                                                                     | <b>-0.7</b> | <b>4.6</b> | <b>2.0</b> |       |       | <b>3.5</b> |
| Our Cr <sub>2</sub> S <sub>3</sub> powder<br>(laser $\lambda$ = 532 nm)                                                     |             |            |            | 304.0 | 344   |            |
| arXiv:1805.08002<br>(laser $\lambda$ = 455 nm)                                                                              |             | 254        | 286        |       |       |            |

Note: The  $\Delta = R_{\text{CrS}_2} - R_{\text{Cr}_2\text{S}_3}$  is the difference of the Raman shift at specific peaks between our CrS<sub>2</sub> and Cr<sub>2</sub>S<sub>3</sub>. We find that there is no an identical change trend among the peaks.

## B. Effect of Raman excitation wavelength on Raman scattering

The Raman spectrum study for TMDs such as MoS<sub>2</sub> has been normally done with the standard green excitation (514 - 532 nm) or in resonant conditions (633 nm). And the existence of a resonant excitation of several peaks when using 633 nm, 785 nm and 325 nm excitation wavelengths is related to electron-phonon coupling with different transitions in the MoS<sub>2</sub> energy band structure. Despite this, the peak positions of the two very intense peaks at 382.9 and 408.1 cm<sup>-1</sup> of bulk MoS<sub>2</sub>, attributed to  $E_{2g}^1$  and  $A_{1g}$  vibration mode, respectively, showed negligible shift with different excitation wavelengths.<sup>2</sup> However, if the sample is very thin such as monolayer WS<sub>2</sub>, the frequencies of the Raman modes would change slightly (within 2 cm<sup>-1</sup>) with a change in laser wavelength.<sup>3</sup> The reasons for this may be due to the increase in lattice temperature by strong optical absorption and the modification of force constants of the

vibration by photo-excited carriers.<sup>4</sup>

The comparison confirms that our samples show some characteristics of the compounds comprising of Cr and S, but our 2D layered CrS<sub>2</sub> has its own Raman features due to its structure.

### **C. Raman spectra from DFPT calculation and comparison with Raman spectra of CVD grown CrS<sub>2</sub>**

The Raman spectra for the polymorphs of CrS<sub>2</sub> are executed from density functional perturbation theory (DFPT) as implemented in the CASTEP package.<sup>5</sup> For the CASTEP computation we have used the VASP optimized structures with a similar k-point mesh as input with Norm-conserving pseudopotentials (energy cut-off 700 eV) and PBE version of GGA exchange correlation functional. Before DFPT calculation, full geometry optimization was performed and both code gave almost same lattice parameter and atomic positions.

The Raman spectra of three phases of CrS<sub>2</sub> are shown in Fig. S8. The calculated Raman modes of each phase of CrS<sub>2</sub> are mentioned inside the Fig. S8. The calculated Raman modes for 1T and 1T' phases are matched with the experimental Raman mode. In general, the calculated Raman shift underestimate the experimental Raman shift.<sup>6</sup> The calculated Raman modes of 2H phase are at 391.4 cm<sup>-1</sup> and 405.6 cm<sup>-1</sup> and those peaks are very low in intensity as observed in experimental Raman spectra. From this comparison (Table S3), we can conclude that the three phases coexist in our CVD grown CrS<sub>2</sub>. Moreover, such low intensity of the characteristics peaks of semiconducting 2H phase indicates the presence of small percentage in the CVD grown CrS<sub>2</sub>.

**Table S3:** Comparison of theoretical and experimental Raman peaks of CrS<sub>2</sub>

| Theoretical<br>(Cm <sup>-1</sup> ) |                     |                      | Experimental<br>(Cm <sup>-1</sup> ) |
|------------------------------------|---------------------|----------------------|-------------------------------------|
| 2H-CrS <sub>2</sub>                | 1T-CrS <sub>2</sub> | 1T'-CrS <sub>2</sub> | As prepared CrS <sub>2</sub> sample |
|                                    |                     | 187.6                | 175                                 |
|                                    | 244.7               | 243.0                | 252                                 |
|                                    |                     | 285.9                | 283                                 |
|                                    |                     | 353.8                | 346.5                               |
|                                    | 361                 |                      | 359                                 |
| 391.4                              |                     |                      | 385                                 |
| 405.6                              |                     | 405.6                | 403                                 |
|                                    |                     | 453.9                |                                     |

(a) DFPT predicted Raman spectra

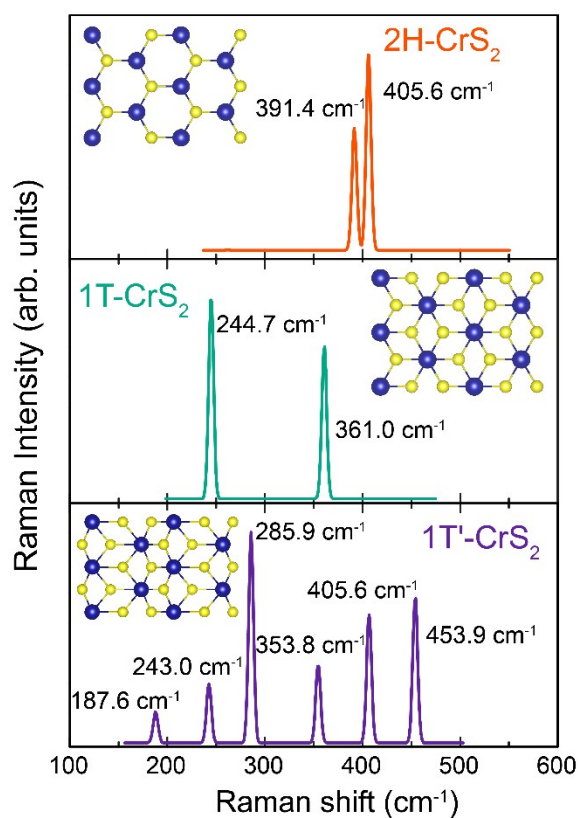

(b) Experimental observation

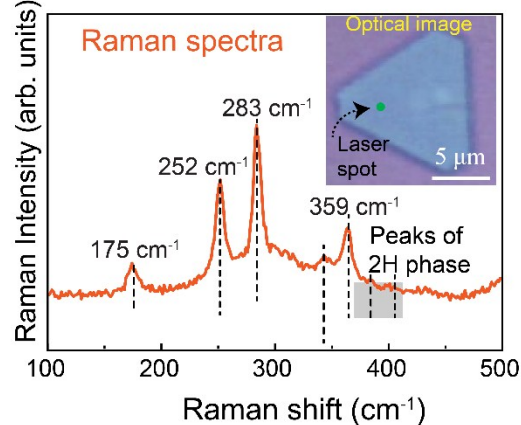

**Fig. S8** (a) Raman spectra of three different phases of CrS<sub>2</sub> predicted from DFPT calculation. (b) Raman spectra of CVD grown CrS<sub>2</sub> film (as depicted inset).

#### D. The analysis of crystallographic structure of 2D layer $\text{CrS}_2$ by comparing to the known compounds containing Cr and S

Our samples both on Si with diffraction peak at about  $33^\circ$  and on  $\text{Al}_2\text{O}_3$  with diffraction peak at  $37^\circ$  substrates have an identical diffraction peak at  $2\theta$  of about  $15^\circ$ . We find that for other 2D layered TMDs such as  $\text{MoS}_2$  and  $\text{WS}_2$ , they also show a diffraction peak at about  $14^\circ - 15^\circ$ , belonging to the (002).<sup>7, 8</sup> The interplanar spacings from the SAED are about 0.2941 nm ( $d_1$ ) and 0.1723 nm ( $d_2$ ) (Fig. S9), which are not matched with those in PDF (Powder Diffraction File) of the compounds containing Cr and S (Fig. S10-S15)

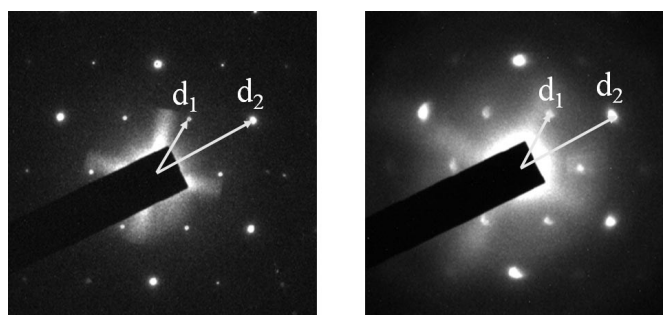

**Fig. S9** SAED patterns for different  $\text{CrS}_2$  flakes.

Jade 6 [LENOVO\*/Materials Data, Inc.] Saturday, Jun 30, 2018 [20150413-Al2O3.ra]

File Edit Filters Analyze Identify PDF Options View Help || Load Save Print Erase Macro Axes Hide Report Zoom Run Web

ICDD/JCPDS PDF Retrievals [Level-2 PDF, Sets 1-49 (04/15/99)]

2 Files 20150413-20150413-

ICSD Patterns (81/28717) 72-1225

| 34 Hits Sorted on Ph... | Chemical Formula         | PDF-#   | J | D | #d/I | RIR   | P.S.  | Space Group   | a      | b      | c      | c/a   | Alpha | Beta   | Gamma  | Z   | Vc  |
|-------------------------|--------------------------|---------|---|---|------|-------|-------|---------------|--------|--------|--------|-------|-------|--------|--------|-----|-----|
| Brezinaite, syn         | $\text{Cr}_3\text{S}_4$  | 72-1225 | C | C | 84   | 1.42  | m14   | I2/m (12)     | 5.694  | 3.428  | 11.272 | 1.980 | 90.00 | 91.50  | 90.00  | 2   | ... |
| Chromium Sulfide        | $\text{Cr}_2\text{S}_3$  | 72-1223 | C | C | 67   | 3.09  | hP20  | P-31c (163)   | 5.939  | 5.939  | 11.192 | 1.884 | 90.00 | 90.00  | 120.00 | 4   | ... |
| Chromium Sulfide        | $\text{Cr}_{87}\text{S}$ | 72-1221 | C | C | 18   | 2.10  | hP3.8 | P-3m1 (164)   | 3.464  | 3.464  | 5.763  | 1.664 | 90.00 | 90.00  | 120.00 | 2   | ... |
| Chromium Sulfide        | $\text{Cr}_5\text{S}_6$  | 72-1222 | C | C | 61   | 2.01  | hP22  | P-31c (163)   | 5.982  | 5.982  | 11.509 | 1.924 | 90.00 | 90.00  | 120.00 | 2   | ... |
| Chromium Sulfide        | $\text{Cr}_2\text{S}_3$  | 72-1224 | C | C | 60   | 3.09  | hR10  | R-3 (148)     | 5.937  | 5.937  | 16.698 | 2.813 | 90.00 | 90.00  | 120.00 | 6   | ... |
| Chromium Sulfide        | $\text{CrS}$             | 72-1226 | C | C | 51   | 2.09  | mC8   | C2/c (15)     | 3.826  | 5.913  | 6.089  | 1.591 | 90.00 | 101.60 | 90.00  | 4   | ... |
| Chromium Sulfide        | $\text{CrS}$             | 77-1625 | ? | C | 15   | 4.41  | hP4   | P63/mmc (194) | 3.439  | 3.439  | 5.324  | 1.548 | 90.00 | 90.00  | 120.00 | 2   | ... |
| Sulfur                  | S6                       | 76-2242 | C | C | 42   | 2.82  | hR6   | R-3 (148)     | 10.766 | 10.766 | 4.225  | 0.392 | 90.00 | 90.00  | 120.00 | 3   | ... |
| Sulfur                  | S11                      | 76-1100 | C | C | 145  | 0.66  | oP88  | Pca21 (29)    | 14.930 | 8.321  | 18.090 | 1.212 | 90.00 | 90.00  | 90.00  | 8   | 2   |
| Sulfur                  | S10                      | 77-0227 | ? | C | 155  | 1.34  | mC40  | C2/c (15)     | 12.533 | 10.275 | 12.776 | 1.019 | 90.00 | 37.98  | 90.00  | 4   | 10  |
| Sulfur                  | S                        | 76-0183 | ? | C | 114  | 25.20 | mP120 | P2 (3)        | 17.600 | 9.250  | 13.800 | 0.784 | 90.00 | 113.00 | 90.00  | 120 | 21  |
| Sulfur                  | S8                       | 74-2110 | ? | C | 142  | 19.73 | mP48  | P21 (4)       | 10.876 | 10.763 | 10.720 | 0.986 | 90.00 | 95.64  | 90.00  | 6   | 1   |
| Sulfur                  | S8                       | 77-0145 | C | C | 149  | 2.11  | oF128 | Fddd (70)     | 10.437 | 12.845 | 24.369 | 2.335 | 90.00 | 90.00  | 90.00  | 16  | 3   |
| Sulfur                  | S8                       | 71-0137 | C | C | 182  |       | mP64  | P21/c (14)    | 10.926 | 10.855 | 10.790 | 0.988 | 90.00 | 95.92  | 90.00  | 8   | 1   |

**Fig. S10** The PDF information about the known compounds comprising Cr and S.

The PDF information of the compounds containing Cr and S for  $\text{Cr}_3\text{S}_4$  (PDF # 72-1225) (Fig. S10),  $\text{Cr}_2\text{S}_3$  (PDF # 72-1223, and PDF # 72-1224) (Fig. S11),  $\text{Cr}_{87}\text{S}$  (PDF # 72-1221) (Fig. S12),  $\text{Cr}_5\text{S}_6$  (PDF # 72-1222) (Fig. S13) and  $\text{CrS}$  (PDF # 72-1225, PDF #



72-12262) (Fig. S14) are below for reference.

| Reference | Lines(97) | PDF2   | HH    |          |        |        |        |   |
|-----------|-----------|--------|-------|----------|--------|--------|--------|---|
| #         | 2-Theta   | d(?)   | I(f)  | (h k l)  | Theta  | 1/(2d) | 2pi/d  | n |
| 1         | 15.716    | 5.6341 | 71.1  | (0 0 2)  | 7.858  | 0.0887 | 1.1152 |   |
| 2         | 17.254    | 5.1350 | 25.3  | (-1 0 1) | 8.627  | 0.0974 | 1.2236 |   |
| 3         | 17.625    | 5.0279 | 54.8  | (1 0 1)  | 8.812  | 0.0994 | 1.2497 |   |
| 4         | 27.168    | 3.2796 | 19.4  | (0 1 1)  | 13.584 | 0.1525 | 1.9158 |   |
| 5         | 28.095    | 3.1734 | 11.8  | (-1 0 3) | 14.048 | 0.1576 | 1.9799 |   |
| 6         | 28.794    | 3.0979 | 17.7  | (1 0 3)  | 14.397 | 0.1614 | 2.0282 |   |
| 7         | 30.414    | 2.9366 | 45.9  | (1 1 0)  | 15.207 | 0.1703 | 2.1396 |   |
| 8         | 31.406    | 2.8460 | 25.7  | (2 0 0)  | 15.703 | 0.1757 | 2.2077 |   |
| 9         | 31.738    | 2.8170 | 2.0   | (0 0 4)  | 15.869 | 0.1775 | 2.2304 |   |
| 10        | 34.214    | 2.6186 | 100.0 | (-1 1 2) | 17.107 | 0.1909 | 2.3994 |   |
| 11        | 34.607    | 2.5898 | 18.6  | (1 1 2)  | 17.303 | 0.1931 | 2.4261 |   |
| 12        | 34.917    | 2.5675 | 10.3  | (-2 0 2) | 17.458 | 0.1947 | 2.4472 |   |
| 13        | 35.422    | 2.5320 | 29.4  | (0 1 3)  | 17.711 | 0.1975 | 2.4815 |   |
| 14        | 35.685    | 2.5140 | 49.8  | (2 0 2)  | 17.842 | 0.1989 | 2.4993 |   |
| 15        | 42.164    | 2.1414 | 5.8   | (2 1 1)  | 21.082 | 0.2335 | 2.9341 |   |
| 16        | 42.729    | 2.1144 | 0.1   | (-1 0 5) | 21.365 | 0.2365 | 2.9716 |   |
| 17        | 43.541    | 2.0768 | 1.1   | (1 0 5)  | 21.770 | 0.2407 | 3.0253 |   |
| 18        | 44.215    | 2.0468 | 89.2  | (-1 1 4) | 22.107 | 0.2443 | 3.0698 |   |
| 19        | 44.626    | 2.0288 | 31.7  | (-2 0 4) | 22.313 | 0.2464 | 3.0969 |   |
| 20        | 44.848    | 2.0193 | 72.2  | (1 1 4)  | 22.424 | 0.2476 | 3.1116 |   |
| 21        | 45.876    | 1.9764 | 39.5  | (2 0 4)  | 22.938 | 0.2530 | 3.1791 |   |
| 22        | 47.607    | 1.9085 | 15.9  | (-2 1 3) | 23.803 | 0.2620 | 3.2922 |   |
| 23        | 48.503    | 1.8753 | 7.9   | (2 1 3)  | 24.251 | 0.2666 | 3.3504 |   |
| 24        | 48.844    | 1.8630 | 1.3   | (3 0 1)  | 24.422 | 0.2684 | 3.3725 |   |
| 25        | 53.411    | 1.7140 | 35.6  | (0 2 0)  | 26.706 | 0.2917 | 3.6658 |   |
| 26        | 54.723    | 1.6760 | 0.8   | (3 0 3)  | 27.361 | 0.2983 | 3.7490 |   |
| 27        | 55.293    | 1.6600 | 55.6  | (3 1 0)  | 27.646 | 0.3012 | 3.7850 |   |
| 28        | 56.035    | 1.6398 | 2.7   | (0 2 2)  | 28.017 | 0.3049 | 3.8317 |   |
| 29        | 56.560    | 1.6258 | 1.3   | (-1 2 1) | 28.280 | 0.3075 | 3.8646 |   |
| 30        | 56.692    | 1.6223 | 3.0   | (1 2 1)  | 28.346 | 0.3082 | 3.8729 |   |
| 31        | 57.465    | 1.6023 | 2.5   | (-3 1 2) | 28.733 | 0.3120 | 3.9213 |   |
| 32        | 57.876    | 1.5919 | 2.2   | (-1 1 6) | 28.938 | 0.3141 | 3.9469 |   |

Fig. S11 PDF # 72-1225 of  $\text{Cr}_3\text{S}_4$ .

| Reference | Lines(68) | PDF2   | HH    |          |        |        |        |   |
|-----------|-----------|--------|-------|----------|--------|--------|--------|---|
| #         | 2-Theta   | d[?]   | I(I)  | (h k l)  | Theta  | 1/(2d) | 2pi/d  | n |
| 1         | 15.824    | 5.5960 | 41.8  | (0 0 2)  | 7.912  | 0.0893 | 1.1228 |   |
| 2         | 17.226    | 5.1433 | 6.3   | (1 0 0)  | 8.613  | 0.0972 | 1.2216 |   |
| 3         | 18.974    | 4.6734 | 29.0  | (1 0 1)  | 9.487  | 0.1070 | 1.3444 |   |
| 4         | 23.473    | 3.7968 | 5.3   | (1 0 2)  | 11.736 | 0.1320 | 1.6592 |   |
| 5         | 29.555    | 3.0199 | 8.1   | (1 0 3)  | 14.778 | 0.1656 | 2.0806 |   |
| 6         | 30.069    | 2.9695 | 22.2  | (1 1 0)  | 15.034 | 0.1684 | 2.1159 |   |
| 7         | 31.959    | 2.7980 | 0.2   | (0 0 4)  | 15.980 | 0.1787 | 2.2456 |   |
| 8         | 34.154    | 2.6231 | 100.0 | (-1 1 2) | 17.077 | 0.1906 | 2.3954 |   |
| 9         | 34.858    | 2.5717 | 1.2   | (2 0 0)  | 17.429 | 0.1944 | 2.4432 |   |
| 10        | 35.797    | 2.5064 | 4.4   | (2 0 1)  | 17.898 | 0.1995 | 2.5069 |   |
| 11        | 36.528    | 2.4578 | 1.4   | (1 0 4)  | 18.264 | 0.2034 | 2.5564 |   |
| 12        | 38.494    | 2.3367 | 1.1   | (2 0 2)  | 19.247 | 0.2140 | 2.6889 |   |
| 13        | 42.667    | 2.1174 | 2.4   | (2 0 3)  | 21.333 | 0.2361 | 2.9675 |   |
| 14        | 44.085    | 2.0524 | 3.2   | (1 0 5)  | 22.043 | 0.2436 | 3.0613 |   |
| 15        | 44.451    | 2.0364 | 94.0  | (-1 1 4) | 22.225 | 0.2455 | 3.0854 |   |
| 16        | 46.686    | 1.9440 | 0.6   | (2 1 0)  | 23.343 | 0.2572 | 3.2321 |   |
| 17        | 47.428    | 1.9153 | 3.3   | (-2 1 1) | 23.714 | 0.2611 | 3.2805 |   |
| 18        | 48.011    | 1.8934 | 0.5   | (2 0 4)  | 24.005 | 0.2641 | 3.3184 |   |
| 19        | 48.780    | 1.8653 | 1.3   | (0 0 6)  | 24.390 | 0.2680 | 3.3684 |   |
| 20        | 49.602    | 1.8363 | 0.9   | (-2 1 2) | 24.801 | 0.2723 | 3.4216 |   |
| 21        | 52.114    | 1.7536 | 0.4   | (1 0 6)  | 26.057 | 0.2851 | 3.5831 |   |
| 22        | 53.078    | 1.7240 | 2.7   | (-2 1 3) | 26.539 | 0.2900 | 3.6446 |   |
| 23        | 53.396    | 1.7144 | 40.6  | (3 0 0)  | 26.698 | 0.2916 | 3.6649 |   |
| 24        | 54.287    | 1.6884 | 1.1   | (2 0 5)  | 27.143 | 0.2961 | 3.7214 |   |
| 25        | 56.056    | 1.6392 | 4.5   | (3 0 2)  | 28.028 | 0.3050 | 3.8330 |   |
| 26        | 57.695    | 1.5965 | 0.6   | (-2 1 4) | 28.848 | 0.3132 | 3.9356 |   |
| 27        | 58.374    | 1.5796 | 13.8  | (-1 1 6) | 29.187 | 0.3165 | 3.9778 |   |
| 28        | 60.598    | 1.5268 | 0.6   | (1 0 7)  | 30.299 | 0.3275 | 4.1153 |   |
| 29        | 61.346    | 1.5100 | 0.2   | (2 0 6)  | 30.673 | 0.3311 | 4.1612 |   |
| 30        | 62.503    | 1.4848 | 1.6   | (2 2 0)  | 31.251 | 0.3368 | 4.2318 |   |
| 31        | 63.310    | 1.4677 | 1.0   | (-2 1 5) | 31.655 | 0.3407 | 4.2809 |   |
| 32        | 63.596    | 1.4618 | 0.2   | (3 0 4)  | 31.798 | 0.3420 | 4.2981 |   |
| 33        | 64.924    | 1.4351 | 9.1   | (-2 2 2) | 32.462 | 0.3484 | 4.3782 |   |

| Reference | Lines(60) | PDF2   | HH    |          |        |        |        |   |
|-----------|-----------|--------|-------|----------|--------|--------|--------|---|
| #         | 2-Theta   | d[?]   | I(I)  | (h k l)  | Theta  | 1/(2d) | 2pi/d  | n |
| 1         | 15.909    | 5.5660 | 41.1  | (0 0 3)  | 7.955  | 0.0898 | 1.1289 |   |
| 2         | 18.037    | 4.9139 | 22.1  | (1 0 1)  | 9.019  | 0.1018 | 1.2787 |   |
| 3         | 20.267    | 4.3780 | 16.1  | (0 1 2)  | 10.134 | 0.1142 | 1.4352 |   |
| 4         | 27.499    | 3.2408 | 6.7   | (1 0 4)  | 13.750 | 0.1543 | 1.9388 |   |
| 5         | 30.079    | 2.9685 | 22.1  | (1 1 0)  | 15.039 | 0.1684 | 2.1166 |   |
| 6         | 31.928    | 2.8007 | 4.2   | (0 1 5)  | 15.964 | 0.1785 | 2.2435 |   |
| 7         | 34.205    | 2.6193 | 100.0 | (1 1 3)  | 17.102 | 0.1909 | 2.3988 |   |
| 8         | 35.295    | 2.5409 | 3.2   | (0 2 1)  | 17.647 | 0.1968 | 2.4729 |   |
| 9         | 36.542    | 2.4570 | 2.7   | (2 0 2)  | 18.271 | 0.2035 | 2.5573 |   |
| 10        | 41.206    | 2.1890 | 1.8   | (0 2 4)  | 20.603 | 0.2284 | 2.8703 |   |
| 11        | 41.706    | 2.1639 | 1.7   | (1 0 7)  | 20.853 | 0.2311 | 2.9037 |   |
| 12        | 44.592    | 2.0303 | 93.0  | (1 1 6)  | 22.296 | 0.2463 | 3.0947 |   |
| 13        | 46.943    | 1.9340 | 1.4   | (0 1 8)  | 23.471 | 0.2585 | 3.2489 |   |
| 14        | 47.037    | 1.9303 | 2.7   | (2 1 1)  | 23.518 | 0.2590 | 3.2550 |   |
| 15        | 48.029    | 1.8927 | 2.1   | (2 1 2)  | 24.014 | 0.2642 | 3.3196 |   |
| 16        | 49.060    | 1.8553 | 1.3   | (0 0 9)  | 24.530 | 0.2695 | 3.3866 |   |
| 17        | 51.853    | 1.7618 | 1.6   | (1 2 4)  | 25.926 | 0.2838 | 3.5664 |   |
| 18        | 52.273    | 1.7486 | 0.8   | (0 2 7)  | 26.136 | 0.2859 | 3.5932 |   |
| 19        | 53.416    | 1.7139 | 40.5  | (3 0 0)  | 26.708 | 0.2917 | 3.6661 |   |
| 20        | 54.593    | 1.6797 | 1.3   | (2 1 5)  | 27.296 | 0.2977 | 3.7407 |   |
| 21        | 56.103    | 1.6380 | 4.4   | (3 0 3)  | 28.051 | 0.3053 | 3.8360 |   |
| 22        | 56.766    | 1.6204 | 0.6   | (2 0 8)  | 28.383 | 0.3086 | 3.8775 |   |
| 23        | 58.027    | 1.5882 | 0.6   | (1 0 10) | 29.014 | 0.3148 | 3.9563 |   |
| 24        | 58.628    | 1.5733 | 13.7  | (1 1 9)  | 29.314 | 0.3178 | 3.9936 |   |
| 25        | 61.495    | 1.5066 | 0.8   | (1 2 7)  | 30.747 | 0.3319 | 4.1703 |   |
| 26        | 62.526    | 1.4842 | 1.6   | (2 2 0)  | 31.263 | 0.3369 | 4.2332 |   |
| 27        | 63.718    | 1.4593 | 0.2   | (0 3 6)  | 31.859 | 0.3426 | 4.3055 |   |
| 28        | 63.887    | 1.4559 | 0.4   | (0 1 11) | 31.944 | 0.3434 | 4.3158 |   |
| 29        | 64.973    | 1.4341 | 9.1   | (2 2 3)  | 32.487 | 0.3486 | 4.3812 |   |
| 30        | 65.581    | 1.4223 | 0.8   | (2 1 8)  | 32.791 | 0.3515 | 4.4176 |   |
| 31        | 65.657    | 1.4209 | 0.8   | (3 1 1)  | 32.828 | 0.3519 | 4.4221 |   |

Fig. S12 PDF # 72-1223 and PDF # 72-1224 of  $\text{Cr}_2\text{S}_3$ .

| Reference | Lines(18) | PDF2   | HH    |         |        |        |        |     |
|-----------|-----------|--------|-------|---------|--------|--------|--------|-----|
| #         | 2-Theta   | d(?)   | I(I)  | (h k l) | Theta  | 1/(2d) | 2pi/d  | n^2 |
| 1         | 15.362    | 5.7630 | 0.1   | (0 0 1) | 7.681  | 0.0868 | 1.0903 |     |
| 2         | 29.757    | 2.9999 | 39.2  | (1 0 0) | 14.878 | 0.1667 | 2.0945 |     |
| 3         | 31.010    | 2.8815 | 2.2   | (0 0 2) | 15.505 | 0.1735 | 2.1805 |     |
| 4         | 33.653    | 2.6610 | 51.4  | (1 0 1) | 16.826 | 0.1879 | 2.3612 |     |
| 5         | 43.513    | 2.0781 | 100.0 | (0 1 2) | 21.756 | 0.2406 | 3.0235 |     |
| 6         | 47.279    | 1.9210 | 0.1   | (0 0 3) | 23.639 | 0.2603 | 3.2708 |     |
| 7         | 52.813    | 1.7320 | 38.1  | (1 1 0) | 26.406 | 0.2887 | 3.6277 |     |
| 8         | 56.868    | 1.6177 | 7.5   | (1 0 3) | 28.434 | 0.3091 | 3.8839 |     |
| 9         | 61.799    | 1.5000 | 2.9   | (2 0 0) | 30.899 | 0.3333 | 4.1889 |     |
| 10        | 62.516    | 1.4845 | 1.1   | (1 1 2) | 31.258 | 0.3368 | 4.2326 |     |
| 11        | 64.098    | 1.4516 | 4.8   | (0 2 1) | 32.049 | 0.3444 | 4.3285 |     |
| 12        | 64.639    | 1.4408 | 5.8   | (0 0 4) | 32.319 | 0.3470 | 4.3611 |     |
| 13        | 70.753    | 1.3305 | 14.6  | (2 0 2) | 35.376 | 0.3758 | 4.7225 |     |
| 14        | 72.754    | 1.2987 | 2.8   | (1 0 4) | 36.377 | 0.3850 | 4.8379 |     |
| 15        | 81.315    | 1.1823 | 2.0   | (0 2 3) | 40.658 | 0.4229 | 5.3146 |     |
| 16        | 85.585    | 1.1339 | 1.4   | (2 1 0) | 42.792 | 0.4410 | 5.5414 |     |
| 17        | 87.636    | 1.1125 | 3.3   | (2 1 1) | 43.818 | 0.4494 | 5.6477 |     |
| 18        | 88.123    | 1.1076 | 10.6  | (1 1 4) | 44.062 | 0.4514 | 5.6726 |     |

**Fig. S13** PDF # 72-1221 of  $\text{Cr}_{87}\text{S}$ .

| Reference | Lines(15) | PDF2   | HH    |         |        |        |        |     |
|-----------|-----------|--------|-------|---------|--------|--------|--------|-----|
| #         | 2-Theta   | d(?)   | I(I)  | (h k l) | Theta  | 1/(2d) | 2pi/d  | n^2 |
| 1         | 29.978    | 2.9783 | 56.3  | (1 0 0) | 14.989 | 0.1679 | 2.1097 |     |
| 2         | 33.639    | 2.6620 | 4.0   | (0 0 2) | 16.820 | 0.1878 | 2.3603 |     |
| 3         | 34.477    | 2.5992 | 46.8  | (1 0 1) | 17.239 | 0.1924 | 2.4173 |     |
| 4         | 45.673    | 1.9848 | 100.0 | (1 0 2) | 22.836 | 0.2519 | 3.1657 |     |
| 5         | 53.227    | 1.7195 | 42.8  | (1 1 0) | 26.613 | 0.2908 | 3.6541 |     |
| 6         | 60.697    | 1.5245 | 5.7   | (1 0 3) | 30.348 | 0.3280 | 4.1214 |     |
| 7         | 62.298    | 1.4891 | 4.1   | (2 0 0) | 31.149 | 0.3358 | 4.2194 |     |
| 8         | 64.457    | 1.4444 | 2.1   | (1 1 2) | 32.228 | 0.3462 | 4.3501 |     |
| 9         | 64.976    | 1.4341 | 4.4   | (2 0 1) | 32.488 | 0.3487 | 4.3813 |     |
| 10        | 70.722    | 1.3310 | 4.5   | (0 0 4) | 35.361 | 0.3757 | 4.7207 |     |
| 11        | 72.698    | 1.2996 | 15.8  | (2 0 2) | 36.349 | 0.3847 | 4.8347 |     |
| 12        | 78.675    | 1.2152 | 2.9   | (1 0 4) | 39.337 | 0.4115 | 5.1706 |     |
| 13        | 84.946    | 1.1407 | 1.7   | (2 0 3) | 42.473 | 0.4383 | 5.5080 |     |
| 14        | 86.358    | 1.1257 | 4.0   | (2 1 0) | 43.179 | 0.4442 | 5.5817 |     |
| 15        | 88.759    | 1.1013 | 3.0   | (2 1 1) | 44.380 | 0.4540 | 5.7051 |     |

**Fig. S14** PDF # 72-1222 of  $\text{Cr}_5\text{S}_6$ .

Reference

Lines(53)

PDF2

| #  | 2-Theta | d(?)   | I(I)  | (h k l)  | Theta  | 1/(2d) | 2pi/d  | n^2 |
|----|---------|--------|-------|----------|--------|--------|--------|-----|
| 1  | 28.167  | 3.1655 | 83.9  | (1 1 0)  | 14.083 | 0.1580 | 1.9849 |     |
| 2  | 29.591  | 3.0163 | 46.2  | (-1 1 1) | 14.796 | 0.1658 | 2.0831 |     |
| 3  | 29.936  | 2.9823 | 9.9   | (0 0 2)  | 14.968 | 0.1677 | 2.1068 |     |
| 4  | 30.204  | 2.9565 | 22.9  | (0 2 0)  | 15.102 | 0.1691 | 2.1252 |     |
| 5  | 33.810  | 2.6489 | 21.6  | (0 2 1)  | 16.905 | 0.1888 | 2.3720 |     |
| 6  | 34.221  | 2.6181 | 28.5  | (1 1 1)  | 17.110 | 0.1910 | 2.3999 |     |
| 7  | 37.735  | 2.3820 | 100.0 | (-1 1 2) | 18.867 | 0.2099 | 2.6378 |     |
| 8  | 43.045  | 2.0996 | 76.7  | (0 2 2)  | 21.522 | 0.2381 | 2.9925 |     |
| 9  | 45.133  | 2.0072 | 52.6  | (1 1 2)  | 22.567 | 0.2491 | 3.1303 |     |
| 10 | 48.542  | 1.8739 | 32.9  | (2 0 0)  | 24.271 | 0.2668 | 3.3529 |     |
| 11 | 49.802  | 1.8294 | 7.2   | (-1 1 3) | 24.901 | 0.2733 | 3.4345 |     |
| 12 | 52.117  | 1.7535 | 2.3   | (-2 0 2) | 26.059 | 0.2852 | 3.5833 |     |
| 13 | 52.406  | 1.7445 | 48.1  | (1 3 0)  | 26.203 | 0.2866 | 3.6018 |     |
| 14 | 53.269  | 1.7182 | 0.6   | (-1 3 1) | 26.635 | 0.2910 | 3.6568 |     |
| 15 | 55.664  | 1.6499 | 3.4   | (0 2 3)  | 27.832 | 0.3031 | 3.8083 |     |
| 16 | 56.265  | 1.6336 | 0.4   | (1 3 1)  | 28.132 | 0.3061 | 3.8461 |     |
| 17 | 57.612  | 1.5986 | 3.0   | (-2 2 1) | 28.806 | 0.3128 | 3.9304 |     |
| 18 | 58.243  | 1.5828 | 4.5   | (2 2 0)  | 29.122 | 0.3159 | 3.9697 |     |
| 19 | 58.712  | 1.5712 | 2.3   | (-1 3 2) | 29.356 | 0.3182 | 3.9989 |     |
| 20 | 58.846  | 1.5680 | 4.7   | (1 1 3)  | 29.423 | 0.3189 | 4.0072 |     |
| 21 | 61.426  | 1.5082 | 19.4  | (-2 2 2) | 30.713 | 0.3315 | 4.1661 |     |
| 22 | 62.204  | 1.4912 | 12.5  | (0 0 4)  | 31.102 | 0.3353 | 4.2136 |     |
| 23 | 62.809  | 1.4783 | 3.6   | (0 4 0)  | 31.404 | 0.3382 | 4.2504 |     |
| 24 | 63.239  | 1.4692 | 2.2   | (2 2 1)  | 31.620 | 0.3403 | 4.2765 |     |
| 25 | 63.688  | 1.4599 | 0.7   | (2 0 2)  | 31.844 | 0.3425 | 4.3037 |     |
| 26 | 64.323  | 1.4470 | 5.1   | (1 3 2)  | 32.162 | 0.3455 | 4.3421 |     |
| 27 | 64.323  | 1.4470 | 5.1   | (-1 1 4) | 32.162 | 0.3455 | 4.3421 |     |
| 28 | 64.938  | 1.4348 | 3.1   | (0 4 1)  | 32.469 | 0.3485 | 4.3790 |     |
| 29 | 68.043  | 1.3767 | 0.2   | (-1 3 3) | 34.021 | 0.3632 | 4.5639 |     |
| 30 | 69.255  | 1.3556 | 1.5   | (-2 2 3) | 34.628 | 0.3689 | 4.6352 |     |
| 31 | 70.697  | 1.3314 | 2.0   | (0 2 4)  | 35.349 | 0.3755 | 4.7192 |     |

Reference

Lines(15)

PDF2

| #  | 2-Theta | d(?)   | I(I)  | (h k l) | Theta  | 1/(2d) | 2pi/d  | n^2 |
|----|---------|--------|-------|---------|--------|--------|--------|-----|
| 1  | 29.978  | 2.9783 | 56.3  | (1 0 0) | 14.989 | 0.1679 | 2.1097 |     |
| 2  | 33.639  | 2.6620 | 4.0   | (0 0 2) | 16.820 | 0.1878 | 2.3603 |     |
| 3  | 34.477  | 2.5992 | 46.8  | (1 0 1) | 17.239 | 0.1924 | 2.4173 |     |
| 4  | 45.673  | 1.9848 | 100.0 | (1 0 2) | 22.836 | 0.2519 | 3.1657 |     |
| 5  | 53.227  | 1.7195 | 42.8  | (1 1 0) | 26.613 | 0.2908 | 3.6541 |     |
| 6  | 60.697  | 1.5245 | 5.7   | (1 0 3) | 30.348 | 0.3280 | 4.1214 |     |
| 7  | 62.298  | 1.4891 | 4.1   | (2 0 0) | 31.149 | 0.3358 | 4.2194 |     |
| 8  | 64.457  | 1.4444 | 2.1   | (1 1 2) | 32.228 | 0.3462 | 4.3501 |     |
| 9  | 64.976  | 1.4341 | 4.4   | (2 0 1) | 32.488 | 0.3487 | 4.3813 |     |
| 10 | 70.722  | 1.3310 | 4.5   | (0 0 4) | 35.361 | 0.3757 | 4.7207 |     |
| 11 | 72.698  | 1.2996 | 15.8  | (2 0 2) | 36.349 | 0.3847 | 4.8347 |     |
| 12 | 78.675  | 1.2152 | 2.9   | (1 0 4) | 39.337 | 0.4115 | 5.1706 |     |
| 13 | 84.946  | 1.1407 | 1.7   | (2 0 3) | 42.473 | 0.4383 | 5.5080 |     |
| 14 | 86.358  | 1.1257 | 4.0   | (2 1 0) | 43.179 | 0.4442 | 5.5817 |     |
| 15 | 88.759  | 1.1013 | 3.0   | (2 1 1) | 44.380 | 0.4540 | 5.7051 |     |

**Fig. S15** PDF # 72-1225 and PDF # 72-12262 of CrS.

### E. Band structure using HSE06 functional

The computational expensive hybrid functional is mostly used to study the exact band position of 2D material. Here we also predicated the band structure of polymorphic CrS<sub>2</sub> using HSE06 functional. The 2H CrS<sub>2</sub> exhibit semiconducting behavior of direct band gap. The predicted band gap is ~1.47 eV which is ~0.5 eV larger than GGA+PBE predicted bandgap. The trigonal and distorted trigonal phase of CrS<sub>2</sub> show metallic behavior (as shown in Fig. S16)

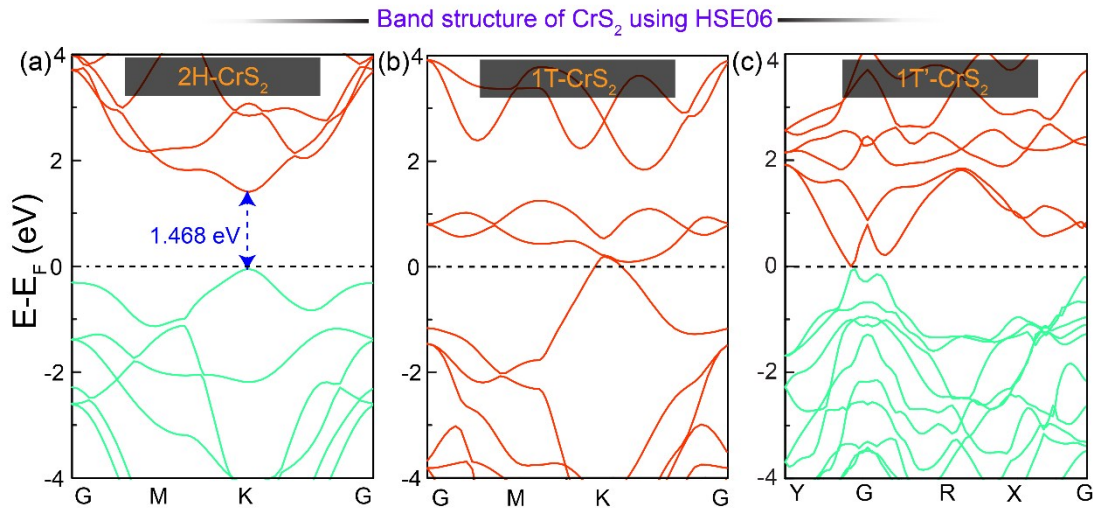

**Fig. S16** Band structure of (a) 2H-CrS<sub>2</sub>, (b) 1T-CrS<sub>2</sub>, and (c) 1T'-CrS<sub>2</sub> using HSE06 functional. Black dotted line represent the Fermi level and set at 0 eV.

## **F. Spin polarized calculation and magnetic properties of polymorphic CrS<sub>2</sub>**

The spin polarized calculation has also been carried out to examine the magnetic behavior of polymorphic CrS<sub>2</sub>. Table S4 shows the relative total energy with respect to the most stable phase with the same functional. For both spin polarized and non-spin polarized calculation within GGA functional the 2H phase is energetically stable. Moreover, the nonmagnetic 2H CrS<sub>2</sub> is energetically favorable and which is consistent with previous studies.<sup>9, 10</sup> After considering the onsite Coulomb U correction within GGA functional, the 1T'-CrS<sub>2</sub> exhibit more stability than other two phases. The value of onsite Coulomb correction for Cr ( $U_{\text{eff}}=2.8$ ) has been taken from previous literature.<sup>9</sup> Furthermore, we calculated the spin polarized DOS using GGA and GGA+U functional. The left panel of Fig. S17 depicts the spin polarized density of states of three phases without U correction and it shows that for three phases the DOS for spin up and spin down are equivalent and identical. From GGA predicted DOS, the polymorphic CrS<sub>2</sub> show nonmagnetic characteristics. But after considering the Hubbard correction (U), the spin polarized density of states for 1T and 1T' phase of CrS<sub>2</sub> are inequivalent for spin up and spin down states. The inequivalent DOS for spin up and down confirm the magnetic nature of 1T and 1T' phases of CrS<sub>2</sub>. More interestingly, the calculated magnetic moment in CrS<sub>2</sub> is affected by the onsite U correction. After adding U correction the magnetic moment per Cr atom for 1T and 1T' phase of CrS<sub>2</sub> change from 0.012 to 0.531  $\mu_B$  and 0  $\mu_B$  to 2.206  $\mu_B$  respectively (Table S4).

**Table S4.** Relative total energy ( $\Delta E$ ) with respect to the most stable configuration calculated with the same functional, magnetic moment per Cr atom

| Functional                | Phase | $\Delta E$ (eV/CrS <sub>2</sub> ) | Mag. mom ( $\mu_B$ ) |
|---------------------------|-------|-----------------------------------|----------------------|
| GGA<br>Non-spin polarized | 2H    | 0.0                               | 0                    |
|                           | 1T    | 0.522                             | 0                    |
|                           | 1T'   | 0.370                             | 0                    |
| GGA<br>Spin-polarized     | 2H    | 0.0                               | 0                    |
|                           | 1T    | 0.524                             | 0.012                |
|                           | 1T'   | 0.370                             | 0                    |
| GGA+(U=2.8)               | 2H    | 0.020                             | 0                    |
|                           | 1T    | 0.338                             | 0.531                |
|                           | 1T'   | 0.0                               | 2.206                |



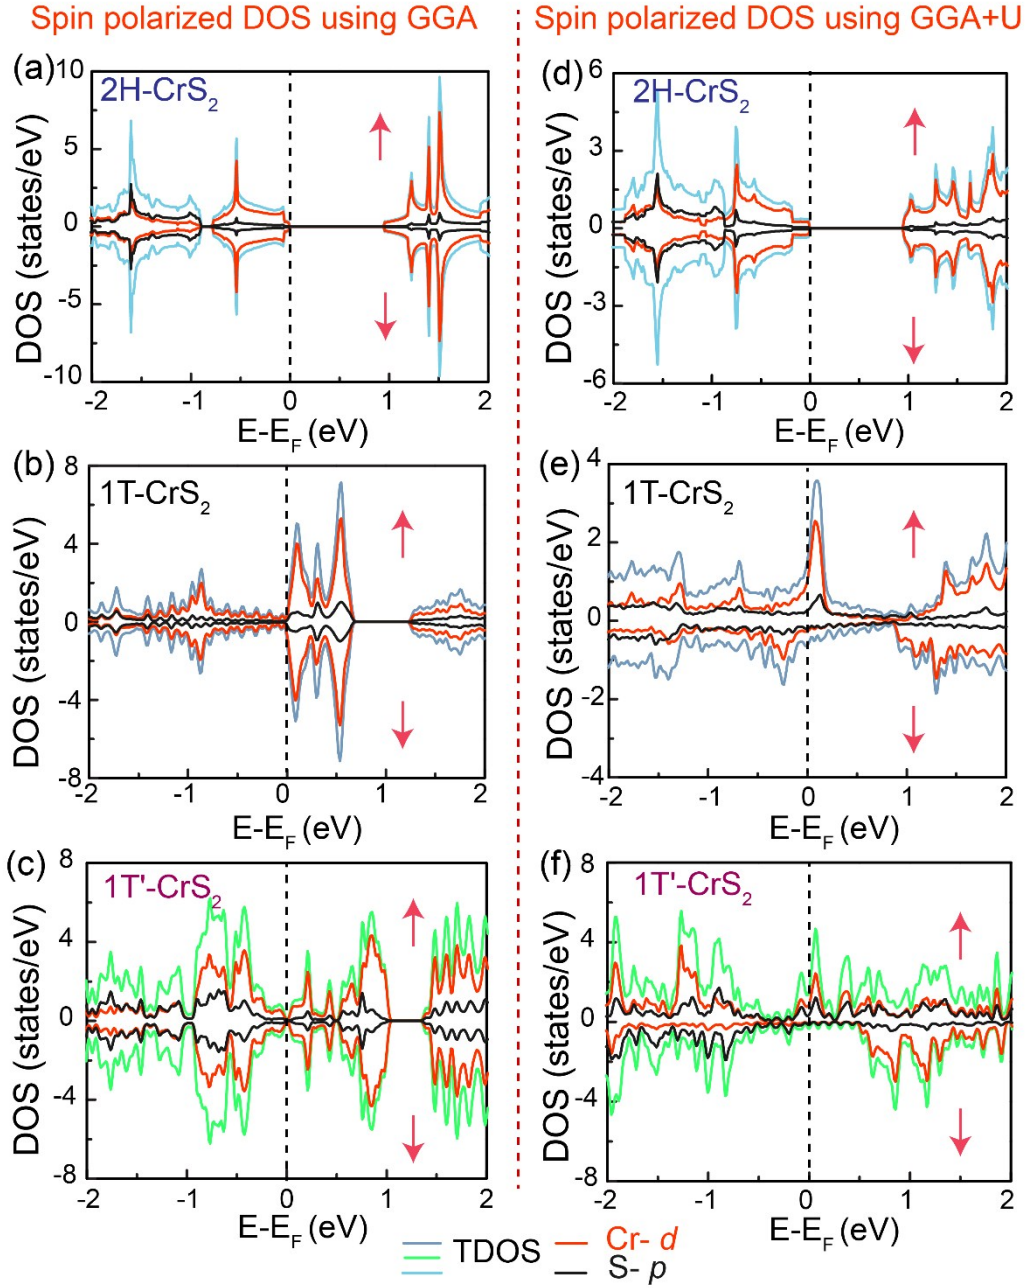

**Fig. S17** Spin polarized density of states using GGA functional and GGA+U of (a, d) 2H-CrS<sub>2</sub> (b, e) 1T-CrS<sub>2</sub>, (c, f) 1T'-CrS<sub>2</sub>. Top and bottom arrows denote spin up and spin down channel, respectively.

## References:

1. S. Zhou, R. Wang, J. Han, D. Wang, H. Li, L. Gan and T. Zhai, *Adv. Funct. Mater.*, 2019, **29**, 1805880.
2. P. Marcel, D. Mirjana, I.-R. Victor, F. Xavier, C.-G. Andres, P.-T. Amador, M. Narcis, E.-R. Moises, L.-M. Simon, N. Markus, B. Veronica, Y. Anatoliy and P.-R. Alejandro, *2D Mater.*, 2015, **2**, 035006.
3. A. Berkdemir, H. R. Gutiérrez, A. R. Botello-Méndez, N. Perea-López, A. L. Elías, C.-I. Chia, B. Wang, V. H. Crespi, F. López-Urías, J.-C. Charlier, H. Terrones and M. Terrones, *Sci. Rep.*, 2013, **3**, 1755.
4. R. Saito, Y. Tatsumi, S. Huang, X. Ling and M. S. Dresselhaus, *J. Phys.: Condens. Matter*, 2016, **28**, 353002.
5. K. Refson, P. R. Tulip and S. J. Clark, *Phys. Rev. B*, 2006, **73**, 155114.
6. P. Vajeeston, P. Ravindran and H. Fjellvåg, *J. Phys. Chem. A*, 2011, **115**, 10708-10719.
7. Y. Yu, G.-H. Nam, Q. He, X.-J. Wu, K. Zhang, Z. Yang, J. Chen, Q. Ma, M. Zhao, Z. Liu, F.-R. Ran, X. Wang, H. Li, X. Huang, B. Li, Q. Xiong, Q. Zhang, Z. Liu, L. Gu, Y. Du, W. Huang and H. Zhang, *Nat. Chem.*, 2018, **10**, 638-643.
8. <http://www.hqgraphene.com/All-Semiconductors.php>.
9. C. Wang, X. Zhou, Y. Pan, J. Qiao, X. Kong, C.-C. Kaun and W. Ji, *Phys. Rev. B*, 2018, **97**, 245409.
10. H. L. Zhuang, M. D. Johannes, M. N. Blonsky and R. G. Hennig, *Appl. Phys. Lett.*, 2014, **104**, 022116.
